# 1 **The jellyfish genome sheds light on the early evolution of active predation**

2 Hak-Min Kim<sup>1,2†</sup>, Jessica A. Weber<sup>3,4†</sup>, Nayoung Lee<sup>5†</sup>, Seung Gu Park<sup>1</sup>, Yun Sung Cho<sup>1,2,6,7</sup>,  
3 Youngjune Bhak<sup>1,2</sup>, Nayun Lee<sup>5</sup>, Yeonsu Jeon<sup>1,2</sup>, Sungwon Jeon<sup>1,2</sup>, Victor Luria<sup>8</sup>, Amir Karger<sup>9</sup>,  
4 Marc W. Kirschner<sup>8</sup>, Ye Jin Jo<sup>5</sup>, Seonock Woo<sup>10,11</sup>, Kyoungsoo Shin<sup>12</sup>, Oksung Chung<sup>6,7</sup>, Jae-  
5 Chun Ryu<sup>13</sup>, Hyung-Soon Yim<sup>11</sup>, Jung-Hyun Lee<sup>11</sup>, Jeremy S. Edwards<sup>14</sup>, Andrea Manica<sup>15</sup>,  
6 Jong Bhak<sup>1,2,6,7\*</sup>, and Seungshic Yum<sup>5,10\*</sup>

7 <sup>1</sup>Korean Genomics Industrialization and Commercialization Center (KOGIC), Ulsan National  
8 Institute of Science and Technology (UNIST), Ulsan 44919, Republic of Korea.

9 <sup>2</sup>Department of Biomedical Engineering, School of Life Sciences, Ulsan National Institute of  
10 Science and Technology (UNIST), Ulsan 44919, Republic of Korea.

11 <sup>3</sup>Department of Genetics, Harvard Medical School, Boston, MA 02115, USA

12 <sup>4</sup>Department of Biology, University of New Mexico, Albuquerque, NM 87131, USA.

13 <sup>5</sup>South Sea Environment Research Center, Korea Institute of Ocean Science and Technology  
14 (KIOST), Geoje 53201, Republic of Korea.

15 <sup>6</sup>Personal Genomics Institute, Genome Research Foundation, Cheongju 28160, Republic of  
16 Korea.

17 <sup>7</sup>Clinomics Inc., Ulsan 44919, Republic of Korea.

18 <sup>8</sup>Department of Systems Biology, Harvard Medical School, Boston, MA 02115, USA.

19 <sup>9</sup>IT - Research Computing, Harvard Medical School, Boston, MA 02115, USA.

20 <sup>10</sup>Faculty of Marine Environmental Science, University of Science and Technology (UST),  
21 Geoje 53201, Republic of Korea.

22 <sup>11</sup>Marine Biotechnology Research Center, Korea Institute of Ocean Science and Technology  
23 (KIOST), Busan 49111, Republic of Korea.

24 <sup>12</sup>Ballast Water Center, Korea Institute of Ocean Science and Technology (KIOST), Geoje 53201,  
25 Republic of Korea.

26 <sup>13</sup>Cellular and Molecular Toxicology Laboratory, Center for Environment, Health and Welfare  
27 Research, Korea Institute of Science and Technology (KIST), Seoul 02792, Republic of Korea.

28 <sup>14</sup>Chemistry and Chemical Biology, UNM Comprehensive Cancer Center, University of New  
29 Mexico, Albuquerque, NM 87131, USA.

30 <sup>15</sup>Department of Zoology, University of Cambridge, Downing Street, Cambridge CB2 3EJ, UK.

31 \*Correspondence: [jongbhak@gmail.com](mailto:jongbhak@gmail.com); [syum@kiost.ac.kr](mailto:syum@kiost.ac.kr)

32 †Equal contributors

33

34 Email addresses:

35 HMK: [howmany2@gmail.com](mailto:howmany2@gmail.com)

36 JAW: [weberj.unm@gmail.com](mailto:weberj.unm@gmail.com)

37 NayoungL: [dylee@kiost.ac.kr](mailto:dylee@kiost.ac.kr)

38 SGP: [seung9park@gmail.com](mailto:seung9park@gmail.com)

39 YSC: [joys0406@gmail.com](mailto:joys0406@gmail.com)

40 YB: [youngjune29bhak@gmail.com](mailto:youngjune29bhak@gmail.com)

41 NayunL: [aklee@kiost.ac.kr](mailto:aklee@kiost.ac.kr)

42 YJ: [brain0106@gmail.com](mailto:brain0106@gmail.com)

43 SJ: [jsw0061@gmail.com](mailto:jsw0061@gmail.com)

44 VL: [Victor\\_Luria@hms.harvard.edu](mailto:Victor_Luria@hms.harvard.edu)

45 AK: [amir\\_karger@hms.harvard.edu](mailto:amir_karger@hms.harvard.edu)

46 MWK: [marc@hms.harvard.edu](mailto:marc@hms.harvard.edu)

47 YJJ: [ye9302@kiost.ac.kr](mailto:ye9302@kiost.ac.kr)

48 SW: [cwoo@kiost.ac.kr](mailto:cwoo@kiost.ac.kr)

49 KS: [ksshin@kiost.ac.kr](mailto:ksshin@kiost.ac.kr)

50 OC: [okokookk219@gmail.com](mailto:okokookk219@gmail.com)

51 JCR: [ryujc@kist.re.kr](mailto:ryujc@kist.re.kr)

52 HSY: [yimh@kiost.ac.kr](mailto:yimh@kiost.ac.kr)

53 JHL: [jlee@kiost.ac.kr](mailto:jlee@kiost.ac.kr)

54 JSE: [jeremy.scott.edwards@gmail.com](mailto:jeremy.scott.edwards@gmail.com)

55 AM: [am315@cam.ac.uk](mailto:am315@cam.ac.uk)

56 JB: jongbhak@gmail.com

57 SY: syum@kiost.ac.kr

58

59 **Abstract**

60 **Background:** Unique among cnidarians, jellyfish have remarkable morphological and  
61 biochemical innovations that allow them to actively hunt in the water column. One of the first  
62 animals to become free-swimming, jellyfish employ pulsed jet propulsion and venomous  
63 tentacles to capture prey.

64 **Results:** To understand these key innovations, we sequenced the genome of the giant Nomura's  
65 jellyfish (*Nemopilema nomurai*), the transcriptomes of its bell and tentacles, and transcriptomes  
66 across tissues and developmental stages of the *Sanderia malayensis* jellyfish. Analyses of  
67 *Nemopilema* and other cnidarian genomes revealed adaptations associated with swimming,  
68 marked by codon bias in muscle contraction and expansion of neurotransmitter genes, along with  
69 expanded Myosin type II family and venom domains; possibly contributing to jellyfish mobility  
70 and active predation. We also identified gene family expansions of *Wnt* and posterior *Hox* genes,  
71 and discovered the important role of retinoic acid signaling in this ancient lineage of metazoans,  
72 which together may be related to the unique jellyfish body plan (medusa formation).

73 **Conclusions:** Taken together, the jellyfish genome and transcriptomes genetically confirm their  
74 unique morphological and physiological traits that have combined to make these animals one of  
75 the world's earliest and most successful multi-cellular predators.

76

77 **Keywords:** Jellyfish mobility, Medusa structure formation, Scyphozoa, *de novo* genome  
78 assembly.

79

## 80 **Background**

81 Cnidarians, including jellyfish and their predominantly sessile relatives the coral, sea anemone,  
82 and hydra, first appeared in the Precambrian Era and are now key members of aquatic  
83 ecosystems worldwide [1]. Between 500 and 700 million years ago, jellyfish developed novel  
84 physiological traits that allowed them to become one of the first free-swimming predators. The  
85 life cycle of the jellyfish includes a small polypoid, sessile stage which reproduces asexually to  
86 form the mobile medusa form that can reproduce both sexually and asexually [2]. The class  
87 Scyphozoa, or true jellyfish, are characterized by a predominant medusa life-stage consisting of a  
88 bell and venomous tentacles used for hunting and defense [3]. Jellyfish medusae feature a  
89 radially symmetric body structure, powered by readily identifiable cell types such as motor  
90 neurons and striated muscles that expand and contract to create the most energy-efficient  
91 swimming method in the animal kingdom [4, 5]. Over 95% water, jellyfish are osmoconformers  
92 that use ion gradients to deliver solutes to cells and tissues where sodium and calcium ions  
93 activate the muscle contractions that power their propulsion. Notably, many jellyfish species can  
94 survive in habitats with varying levels of salinity and are successful in low-oxygen environments,  
95 allowing them to bloom even in dead zones [6]. These innovations have allowed them to  
96 colonize aquatic habitats across the globe both in brackish and marine environments, spanning  
97 the shallow surface waters to the depths of the seas.

98

## 99 **Results and discussion**

### 100 **Jellyfish genome assembly and annotation**

101 Here, we present the first *de novo* genome assembly of a jellyfish (*Nemopilema nomurai*). It  
102 resulted in a 213 Mb genome comprised of 255 scaffolds and an N50 length of 2.71 Mb,

103 containing only 1.48 % gaps (Additional file 1: Tables S2 and S3). The *Nemopilema* hybrid  
104 assembly was created using a combination of short and long read sequencing technologies,  
105 consisting of 38.2 Gb Pacific Biosciences (PacBio) single molecule real time sequencing (SMRT)  
106 reads, along with 98.6 Gb of Illumina short insert, mate-pair, and TruSeq synthetic long reads  
107 (Additional file 1: Figures S3-S5; Tables S4-S7). The resulting assembly shows the longest  
108 continuity among cnidarian genomes (Additional file 1: Table S9). We predicted 18,962 protein-  
109 coding jellyfish genes by combining *de novo* (using medusa bell and tentacle tissue  
110 transcriptomes) and homologous gene prediction methods (Additional file 1: Tables S10 and  
111 S11). This process recovered the highest number of single-copy orthologous genes [7] among all  
112 published non-bilaterian metazoan genome assemblies to date (Additional file 1: Table S12). A  
113 total of 21.07% of the jellyfish genome was found to be made up of transposable elements,  
114 compared to those of *Acropora digitifera* (9.45%), *Nematostella vectensis* (33.63%), and *Hydra*  
115 *magnipapillata* (42.87%) (Additional file 1: Table S13).

116 We compared the *Nemopilema* genome to other cnidarian genomes, all of which are from  
117 predominantly sessile taxa, to detect unique Scyphozoa function (active mobility), physical  
118 structure (medusa bell), and chemistry (venom). We also performed transcriptome analyses of  
119 both *Nemopilema nomurai* and the *Sanderia malayensis* jellyfish across three medusa tissue  
120 types and four developmental stages.

121

## 122 **Evolutionary analysis of the jellyfish**

123 To identify jellyfish-specific evolutionary traits, we examined gene family expansions and  
124 contractions across one unicellular holozoan and eleven metazoans using 15,255 orthologous

125 gene families (see Additional file 1: Section 4.1). Of these, 7,737 were found in *Nemopilema* and  
126 4,156 were shared by all four available cnidarian genomes (*Nemopilema nomurai*, *Hydra*  
127 *magnipapillata* [8], *Acropora digitifera* [9], and *Nematostella vectensis* [10]; Fig. 1a). A  
128 phylogeny constructed using these orthologs revealed a monophyletic cnidarian clade that  
129 diverged from the metazoan stem prior to the evolution of the bilaterians (Fig. 1b; Additional file  
130 1: Figure S7). To determine how many genes appeared in every evolutionary era in the genome  
131 of Nomura's jellyfish, we also evaluated the evolutionary age of the protein-coding genes.  
132 Grouping jellyfish genes into 3 broad evolutionary eras, we observed that while the majority  
133 (80%) of genes are ancient (older than 741 Mya), a few (~3%) are of an intermediate age (741 -  
134 239 Mya) and some (17%) are young (239 Mya to present; Fig. 1c; Additional file 1: Figure S10).  
135 Interestingly, normalizing the number of genes by the age and length of evolutionary era  
136 suggests that gene turnover is highest near the present time. In total, the *Nemopilema* genome  
137 contained 67 expanded and 80 contracted gene families compared to the common ancestor of  
138 *Nemopilema* and *Hydra* (Fig. 1b; see Additional file 1: Section 4.2). Gene Ontology (GO) terms  
139 related to sensory perception were under-represented in the Cnidaria lineage compared to  
140 Bilateria, accurately reflecting cnidarian's less complex sensory system (Additional file 1: Tables  
141 S14 and S15). However, neurotransmitter transport function (GO:0005326,  $P = 1.66E-16$ ) was  
142 significantly enriched in *Nemopilema* compared to other cnidarians (Additional file 1: Tables  
143 S16 and S17), likely due to the balance and visual structures, such as the statocyst and ocelli, that  
144 are more elaborate in the mobile medusa than in sessile polyps [11].

145

146 **Genomic context and muscle associated genes**

147 Jellyfish have two primary muscle types: the epitheliomuscular cells, which are the predominant  
148 muscle cells found in sessile cnidarians; and the striated muscle cells located in the medusa bell  
149 that are essential for swimming. To understand the evolution of active-swimming in jellyfish, we  
150 examined their codon bias compared to other metazoans by calculating the guanine and cytosine  
151 content at the third codon position (GC3) [12, 13] (Additional file 1: Figure S13). It has been  
152 suggested that genes with high level of GC3 are more adaptable to external stresses (e.g.,  
153 environmental changes) [14]. Among the high-scoring top 100 GC3 biased genes, the regulation  
154 of muscle contraction and neuropeptide signaling pathways GO terms were specific to  
155 *Nemopilema* (Additional file 4). Calcium plays a key role in the striated muscle contraction in  
156 jellyfish, and the calcium signaling pathway (GO:0004020,  $P = 5.60E-10$ ) showed a high level of  
157 GC3 biases specific to *Nemopilema*. *Nemopilema* top 500 GC3 genes were enriched in GO terms  
158 associated with homeostasis (e.g. cellular chemical homeostasis and sodium ion transport),  
159 which we speculate is essential for the activation of muscle contractions that power the  
160 jellyfish's mobile predation (see Additional file 1: Section 5.1).

161 Since cnidarians have been reported to lack titin and troponin complexes, which are critical  
162 components of bilaterian striated muscles, it has been suggested that the two clades  
163 independently evolved striated muscles [15]. A survey of genes that encode muscle structural  
164 and regulatory proteins in cnidarians showed a conserved eumetazoan core actin-myosin  
165 contractile machinery shared with bilaterians (Additional file 1: Table S23). However, like other  
166 cnidarians, *Nemopilema* lacks titin and troponin complexes, which are key components of  
167 bilaterian striated muscles. Also,  $\gamma$ -syntrophin, a component of the dystroglycan complex, was  
168 absent in both *Nemopilema* and *Hydra*. However, *Nemopilema* do possess  $\alpha/\beta$ -Dystrobrevin and  
169  $\alpha/\epsilon$ -Sarcoglycan dystroglycan-associated costamere proteins, indicating that several components



170 of the dystroglycan complex were lost after the Scyphozoa-Hydrozoa split. It was suggested that  
171 *Hydra* undergone secondary simplifications relative to *Nematostella*, which has a greater degree  
172 of muscle-cell-type specialization [8]. Compared to *Hydra* and *Nematostella*, *Nemopilema* shows  
173 intermediate complexity of muscle structural and regulatory proteins between *Hydra* and  
174 *Nematostella*.

175

### 176 **Medusa bell and tentacle transcriptome profiling**

177 Jellyfish medusa bell and tentacles are morphologically distinct and perform discrete  
178 physiological functions [16, 17]. We generated bell and tentacle transcriptomes from  
179 *Nemopilema* and the smaller *Sanderia malayensis*, which can be grown in the laboratory, to  
180 assess developmental regulation (Additional file 1: Table S20). Enrichment tests of highly  
181 expressed genes showed that muscle-associated functional categories (e.g. muscle myosin  
182 complex and muscle tissue morphogenesis) were enriched in the bell (Fig. 2a; see Additional file  
183 5). Myosins comprise a superfamily of motor proteins and play a critical role in muscle  
184 contraction and are involved in a wide range of motility processes in Eukaryotes. Critically, the  
185 Myosin II family proteins, found in cells of both striated muscle tissue and smooth muscle tissue,  
186 are responsible for producing contraction in muscle cells [18]. Cnidarians possess both  
187 epitheliomuscular cells and striated muscle cells. Striated muscle is a critical component of the  
188 subumbrella of the medusa bell, where its fast contractions power the unique propulsion-based  
189 swimming of the jellyfish. We found that type II Myosin heavy chain (MYH) and Myosin light  
190 chain (MYL) gene families were highly expressed in the bell, and are closely associated with  
191 striated and smooth muscle cells [15]. Interestingly, *Nemopilema* also showed the largest copy

192 numbers of MYH and MYL genes among non-bilaterian metazoans (Fig. 2c; see Additional file  
193 1: Section 5.3), and six of the seven MYH genes and 12 out of 21 MYL genes showed higher  
194 expression in the bell than the tentacles with very high ~8.8 and ~17-fold increase on average,  
195 respectively (Fig. 2d). These results suggest that the combinations of copy number expansion of  
196 type II Myosin gene families and high expression of muscle associated genes confirmed that  
197 muscles in medusa bell are an important determinant of jellyfish motility.

198 Conversely, gene expression analyses of the tentacles revealed high RNA expression levels of  
199 neurotransmitter associated functional categories (ion channel complex, postsynapse, and  
200 neurotransmitter receptor activity; Fig. 2b); consistent with the anatomy of jellyfish tentacles,  
201 which contain the sensory cells and a loose plexus of the neuronal subpopulation at the base of  
202 the ectoderm [19].

203

## 204 **Body patterning in the jellyfish**

205 There has been much debate surrounding the early evolution of body patterning in the metazoan  
206 common ancestor, particularly concerning the origin and expansion of Hox and *Wnt* gene  
207 families [20-22]. In total, 83 homeodomains were found in *Nemopilema*, while 41, 120, and 148  
208 of homeodomains were found from *Hydra*, *Acropora*, and *Nematostella*, respectively (Additional  
209 file 1: Table S24). Five of the eight Hox genes in *Nemopilema* are of the posterior type that are  
210 associated with aboral axis development [22] and clustered with *Nematostella*'s posterior Hox  
211 genes, *HOXE* and *HOXF* (Additional file 1: Figures S18-S20). Though absent in *Hydra* and  
212 *Acropora*, synteny analyses of ParaHox genes in *Nemopilema* show that the *XLOX/CDX* gene is  
213 located immediately downstream of *GSX* in the same tandem orientation as those in

214 *Nematostella*, suggesting that *XLOX/CDX* was present in the cnidarian common ancestor and  
215 subsequently lost in some lineages (Additional file 1: Figure S21). Hox related genes, *EVX* and  
216 *EMX*, are also present in *Nemopilema*, although they are absent in *Hydra*. Given the large  
217 amount of ancestral diversity in the *Wnt* genes, it has been proposed that Wnt signaling  
218 controlled body plan development in the early metazoans [23]. *Nemopilema* possesses 13 *Wnt*  
219 orthologs representing 10 *Wnt* subfamilies (Additional file 1: Figure S22; Table S25). *Wnt9* is  
220 absent from all cnidarians, likely representing losses in the cnidarian common ancestor.  
221 Cnidarians have undergone dynamic lineage specific *Wnt* subfamily duplications, such as *Wnt8*  
222 (*Nematostella* and *Acropora*), *Wnt10* (*Hydra*), and *Wnt11*, and *Wnt16* (*Nemopilema*). It has been  
223 proposed that a common cluster of *Wnt* genes (*Wnt1–Wnt6–Wnt10*) existed in the last common  
224 ancestor of arthropods and deuterostomes [24]. Our analyses of cnidarian and bilaterian genomes  
225 revealed that *Acropora* also possess this cluster, while *Nemopilema* and *Hydra* are missing *Wnt6*,  
226 suggesting loss of the *Wnt6* gene in the Medusozoa common ancestor (Additional file 1: Figure  
227 S23). Taken together, the jellyfish have comparable number of Hox and *Wnt* genes to other  
228 cnidarians, but the dynamic repertoire of these gene families suggests that cnidarians have  
229 evolved independently to adapt their physiological characteristics and life cycle.

230

### 231 **Polyp to medusa transition in jellyfish**

232 The polyp-to-medusa transition is prominent in jellyfish compared to the other sessile cnidarians.  
233 To understand the genetic basis of the medusa structure formation in the jellyfish, we compared  
234 transcriptional regulation between cnidarians and across jellyfish developmental stages (see  
235 Additional file 1: Sections 7.1 and 7.2). We assembled the *Sanderia* transcripts using six pooled  
236 samples of transcriptomes (Additional file 1: Table S26). The assembled transcripts had a total

237 length of 61 Mb and resulted in 58,290 transcript isoforms and 43,541 unique transcripts, with a  
238 N50 of 2,325 bp. On average, 87% of the RNA reads were aligned to into the assembled  
239 transcripts (Additional file 1: Table S27), indicating that the transcript assembly represented the  
240 majority of sequenced reads. Furthermore, the composition of the protein domains contained in  
241 the top 20 ranks was quite similar between *Nemopilema* and *Sanderia* (Additional file 1: Table  
242 S28). To obtain differentially expressed genes for each stage, we compared each stage with the  
243 previous or next stage in the life cycle of the jellyfish. The polyp stage, which represents a  
244 sessile stage in the jellyfish life cycle, showed enriched terms related to ion channel activity and  
245 energy metabolism (regulation of metabolic process, and amino sugar metabolic process;  
246 Additional file 1: Table S29). Active feeding in the polyp stimulates asexual proliferation either  
247 into more polyps or metamorphosis to strobila [25]. Since anthozoans do not form a medusa, the  
248 strobila asexual reproductive stage is an important stage in which to study the metamorphosis  
249 from polyp to medusa. In this stage, GO terms related to amide biosynthetic and metabolic  
250 process were highly expressed compared to the polyp stage (Additional file 1: Table S30). It has  
251 been reported that RF-amide and LW-amide neuropeptides were associated with metamorphosis  
252 in cnidarians [26-28]. However, we could not confirm this finding in our strobila and ephyra  
253 stage comparisons. In our system, the gene expression patterns of the two stages are quite  
254 similar. In the ephyra, the released mobile stage, GO terms involving amide biosynthetic and  
255 metabolic process were also highly expressed compared to the merged medusa stage (Additional  
256 file 1: Table S31). In the medusa, extracellular matrix, metalloproteinase activity, and immune  
257 system process terms were enriched (Additional file 1: Table S32), consistent with the  
258 physiology of their bell, tentacles, and oral arm tissue types.

259 Polyp-to-medusa metamorphosis was previously shown to be strongly associated with *CL390*  
260 and *retinoid X receptor (RXR)* genes in the *Aurelia aurita* jellyfish [29]. Interestingly, *CL390*  
261 was not found in *Nemopilema* or other published cnidarians, suggesting that it may be an  
262 *Aurelia*-specific strobilation inducer gene. However, we confirm that *RXR* is present in  
263 *Nemopilema*, and absent from cnidarians without a prominent medusa stage (Additional file 1:  
264 Figure S24). Retinoic acid (RA) signaling plays a central role during vertebrate growth and  
265 development [30], where it regulates transcription by interacting with the RA receptor (RAR)  
266 bound to RA response elements (RAREs) of nearby target genes [31]. Of the genes in the RA  
267 signaling pathway, *Nemopilema* possess ADH and RALDH enzymes that metabolize retinol to  
268 RA, and *RXR* and RAREs to activate transcription of the target gene (Fig. 3a). We discovered  
269 1,630 *Nemopilema* RAREs regions with an average distance of 13 Kbp to the nearest gene (Fig.  
270 3b; Additional file 1: Tables S33 and S34). Interestingly, four posterior Hox genes of  
271 *Nemopilema* were located within  $\pm 10$  Kbp from RAREs, which is unique among the non-  
272 bilaterian metazoans (Fig. 3c). Together these findings suggest that retinoic acid signaling was  
273 present in early metazoans for regulating target genes with *RXR* and RAREs, and that *RXR* and  
274 RAREs may play a critical role for polyp-to-medusa metamorphosis [29]

275

## 276 **Identification of toxin related domains in jellyfish**

277 Jellyfish produce complex mixtures of proteinaceous venoms for active prey capture and defense  
278 [32]. We identified abundant toxin domains in *Nemopilema* when compared to the non-bilaterian  
279 metazoan gene sets in the Tox-Prot database [33]. In total, 69 out of 136 toxin domains aligned  
280 to non-bilaterian metazoans; of these 69 toxin domains, 53 were found in *Nemopilema*  
281 (Additional file 1: Table S35). Expectedly, the *Nemopilema* genome contains the largest number

282 of venom or toxin associated domains of the included non-bilaterian metazoans. These domains  
283 include Reprolysin (M12B) family zinc metalloprotease (PF01421), Kazal-type serine protease  
284 inhibitor domain (PF07648), phospholipase A<sub>2</sub> (PF05826), and ShK domain-like (PF01549)  
285 domains (Fig. 4). Compared to the common ancestor of *Nemopilema* and *Hydra*, *Nemopilema*  
286 showed expanded gene families associated with metalloprotease activities (GO:0008237,  $P =$   
287 1.99E-16). In particular, Reprolysin (M12B) family zinc metalloproteases are enzymes that  
288 cleave peptides and comprise most snake venom endopeptidases [34]. Furthermore, it has been  
289 reported that serine protease inhibitor and ShK domains were abundantly found in the  
290 transcriptomes of both the cannonball jellyfish (*Stomolophus meleagris*), and the box jellyfish  
291 (*Chironex fleckeri*)[35, 36], and phospholipase A<sub>2</sub> is well-characterized toxin-related enzyme,  
292 which is critical to the production of venom components, found in the class Scyphozoa [37].

293

## 294 **Conclusions**

295 A unique branch on the tree of life, jellyfish have evolved remarkable morphological and  
296 biochemical innovations that allow them to actively hunt using pulsed jet propulsion and  
297 venomous tentacles. While the expansion and contraction of distinct families reflect the  
298 adaptation to salinity and predation and the convergent evolution of muscle elements, the  
299 *Nemopilema* genome strikes a balance between the conservation of many ancient genes and an  
300 innovative potential reflected in significant number of new genes that appeared since  
301 *Rhizostomeae* emerged. The *Nemopilema nomurai* genome has provided clues to the genetic  
302 basis of the innovative structure, function, and chemistry that have allowed this distinctive early  
303 group of predators to colonize the waters of the globe.



## 305 **Methods**

### 306 **Sample preparation**

307 A medusa *Nemopilema nomurai* was collected at the Tongyeong Marine Science Station, KIOST  
308 (34.7699 N, 128.3828 E) on Sep. 12, 2013. The *Sanderia malayensis* samples were obtained  
309 from Aqua Planet Jeju Hanwha (Seogwipo, Korea) for transcriptome analyses of developmental  
310 stages since *Nemopilema* cannot be easily grown in the laboratory. The DNA and RNA  
311 preparation of *Nemopilema* and *Sanderia* are described in the Additional file 1: Section 1.1.  
312 Species identification of *Nemopilema* was confirmed by comparing the *MT-COI* gene of five  
313 species of jellyfish. We aligned *Nemopilema* Illumina short reads (~400 bp insert-size) to the  
314 *MT-COI* gene of *Chrysaora quinquecirrha* (NC\_020459.1), *Cassiopea frondosa* (NC\_016466.1),  
315 *Craspedacusta sowerbyi* (NC\_018537.1), and *Aurelia aurita* (NC\_008446.1) jellyfish with  
316 BWA-MEM aligner [38]. Consensus sequences for each jellyfish were generated using  
317 SAMtools [39]. The consensus sequence from *C. sowerbyi* was excluded due to low coverage.  
318 We conducted multiple sequence alignment using MUSCLE [40] and ran the MEGA v7 [41]  
319 neighbor joining phylogenetic tree (gamma distribution) with 1,000 bootstrap replicates.  
320 Mitochondrial DNA phylogenetic analyses confirmed the identification of the *Nemopilema*  
321 sample as *Nemopilema nomurai*.

322

### 323 **Genome sequencing and scaffold assembly**

324 For the *de novo* assembly of *Nemopilema*, PacBio SMRT and five Illumina DNA libraries with  
325 various insert sizes (400bp, 5 Kb, 10 Kb, 15 Kb, and 20 Kb) were constructed according  
326 manufacturers' protocols. The Illumina libraries were sequenced using a HiSeq2500 with read



327 length of 100 bp (400 bp, 15 Kb, and 20 Kb) and a HiSeq2000 with read length of 101 bp (5 Kb  
328 and 10 Kb). Quality filtered PacBio subreads were assembled into distinct contigs using the  
329 FALCON assembler [42] with various read length cutoffs. To extend contigs to scaffolds, we  
330 aligned the Illumina long mate-pair libraries (5 Kb, 10 Kb, 15 Kb, and 20 Kb) to contig sets and  
331 extended the contigs using SSPACE [43]. Gaps generated by SSPACE were filled by aligning  
332 the Illumina short-insert paired-end sequences using GapCloser [44]. We also generated TSLRs  
333 using an Illumina HiSeq2000, which were aligned to scaffolds to correct erroneous sequences  
334 and to close gaps using an in-house script. Detailed genome sequencing and assembly process  
335 are provided in Additional file 1: Section 2.2.

336

### 337 **Genome annotation**

338 The jellyfish genome was annotated for protein-coding genes and repetitive elements. We  
339 predicted protein-coding genes using a two-step process, with both homology and evidence-  
340 based prediction. Protein sequences of the sea anemone, hydra, sponge, human, mouse, and fruit  
341 fly from the NCBI database, and Cnidaria protein sequences from the NCBI Entrez protein  
342 database were used for homology-based gene prediction. Two tissue transcriptomes from  
343 *Nemopilema* were used for evidence-based gene prediction via AUGUSTUS [45]. Final  
344 *Nemopilema* protein-coding genes were determined using AUGUSTUS with exon (from  
345 homology-based gene prediction) and intron (from evidence-based gene prediction) hints.  
346 Repetitive elements were also predicted using Tandem Repeats Finder [46] and RepeatMasker  
347 [47]. Details of the annotation process are provided in Additional file 1: Sections 3.1 and 3.2.

348

## 349 **Gene age estimation**

350 Phylostratigraphy employs BLASTP-scored sequence similarity to estimate the minimal age of  
351 every protein-coding gene. The protein sequence is used to query the NCBI non-redundant  
352 database and detect the most distant species in which a sufficiently similar sequence is present,  
353 and inferring that the gene is at least as old as the age of the common ancestor [48]. For every  
354 species, we use the NCBI taxonomy. The timing of most divergence events is estimated using  
355 TimeTree [49] and the Encyclopedia of Life [50]. To facilitate detection of sequence similarity,  
356 we use the e-value threshold of  $10^{-3}$ . We evaluate the age of all proteins whose length is equal or  
357 greater than 40 amino acids. We count the number of genes in each phylostratum, from most  
358 ancient (PS 1) to newest (PS 11). To see broad evolutionary patterns, we aggregate the counts  
359 from several phylostrata into 3 broad evolutionary eras: ancient (PS 1-5, cellular organisms to  
360 Eumetazoa, 4,204 Mya - 741 Mya), middle (PS 6-7, Cnidaria to Scyphozoa, 741 Mya - 239 Mya)  
361 and young (PS 8-11, Rhizostomeae to *Nemopilema nomurai*, 239 Mya to present).

362

## 363 **Comparative evolutionary analyses**

364 Orthologous gene clusters were constructed to examine the conservation of gene repertoires  
365 among the genomes of the *Nemopilema nomurai*, *Hydra magnipapillata*, *Acropora digitifera*,  
366 *Nematostella vectensis*, *Caenorhabditis elegans*, *Danio rerio*, *Drosophila melanogaster*, *Homo*  
367 *sapiens*, *Trichoplax adhaerens*, *Amphimedon queenslandica*, *Mnemiopsis leidyi*, and *Monosiga*  
368 *brevicollis* using OrthoMCL [51]. To infer a phylogeny and divergence times, we used RAxML  
369 [52] and MCMCTree [53], respectively. A gene family expansion and contraction analysis was  
370 conducted using the Café program [54]. Domain regions were predicted by InterProScan [55]

371 with domain databases. Details of the comparative analysis are provided in Additional file 1:  
372 Sections 4.1-4.4.

373

### 374 **Transcriptome sequencing and expression profiling**

375 Illumina RNA libraries from *Nemopilema nomurai* and *Sanderia malayensis* were sequenced  
376 using a HiSeq2500 with 100 bp read lengths. Since there is not a reference genome for *S.*  
377 *malayensis*, we *de novo* assembled a pooled six RNA-seq read set using the Trinity assembler  
378 [56]. Quality filtered RNA reads from *Nemopilema* and *Sanderia* were aligned to the  
379 *Nemopilema* genome assembly and the assembled transcripts, respectively, using the TopHat [57]  
380 program. Expression values were calculated by the Fragments Per Kilobase Of Exon Per Million  
381 Fragments Mapped (FPKM) method using Cufflinks [57], and differentially expressed genes  
382 were identified by DEGseq [58]. Details of the transcriptome analysis are presented in  
383 Additional file 1: Sections 5.2 and 7.1.

384

### 385 **Hox and ParaHox analyses**

386 We examined the homeodomain regions in *Nemopilema* using the InterProScan program. Hox  
387 and ParaHox genes were identified in *Nemopilema* by aligning the homeodomain sequences of  
388 human and fruit fly to the identified *Nemopilema* homeodomains. We considered only domains  
389 that were aligned to both the human and fruit fly. We also used this process for *Acropora*, *Hydra*,  
390 and *Nematostella* for comparison. Additionally, we added one Hox gene for *Acropora* and two  
391 Hox genes for *Hydra*, which are absent in NCBI gene set, though they were present in previous

392 study [21, 59]. Hox and ParaHox genes of *Clytia hemisphaerica*, a hydrozoan species with a  
393 medusa stage, were also added based on a previous study [60]. Finally, a multiple sequence  
394 alignment of these domains was conducted using MUSCLE, and a FastTree [61] maximum-  
395 likelihood phylogeny was generated using the Jones–Taylor–Thornton (JTT) model with gamma  
396 option.

397

### 398 ***Wnt* gene subfamily analyses**

399 *Wnt* genes of *Nematostella* and *Hydra* were downloaded from previous studies [23, 62], and  
400 those of *Acropora* were downloaded from the NCBI database. *Wnt* genes in *Nemopilema* were  
401 identified using the Pfam database by searching for "wnt family" domains. A multiple sequence  
402 alignment of *Wnt* genes was conducted using MUSCLE, and aligned sequences were trimmed  
403 using the trimAl program [63] with “gappyout” option. A phylogenetic tree was generated using  
404 RAxML with the PROTGAMMAJTT model and 100 bootstraps.

405

### 406 **Abbreviations**

407 SMRT, Single molecule real time sequencing; TSLR, TruSeq synthetic long reads;

408

## 409 **Declarations**

### 410 **Availability of data and materials**

411 The jellyfish genome project has been deposited at DDBJ/ENA/GenBank under the accession  
412 PEDN00000000. The version described in this paper is version PEDN01000000. Raw DNA and  
413 RNA sequence reads for *Nemopilema nomurai* and *Sanderia malayensis* have been submitted to  
414 the NCBI Sequence Read Archive database (SRA627560). All other data can be obtained from  
415 the authors upon reasonable request.

416

### 417 **Authors' contributions**

418 JB and SY supervised the project. YSC, JB, and SY planned and coordinated the project. HMK,  
419 JAW, YSC, SY, and JB wrote the manuscript. NayoungL, NayunL, YJJ, SW, KS, JCR, HSY,  
420 JHL, and SY prepared the samples, performed the experiments, and provided toxinological  
421 considerations. VL, AK, and MWK performed the gene evolutionary age analysis. HMK, SGP,  
422 YSC, YB, YJ, SJ, OC, JSE, and AM performed in-depth bioinformatics data analyses. All  
423 authors reviewed the manuscript and discussed the work.

424

### 425 **Ethics approval**

426 This is not applicable.

427

428 **Competing interests**

429 YSC and OC are employees, and JB is on the scientific advisory board of Clinomics Inc. HMK,  
430 YSC and JB have an equity interest in the company. All other coauthors have no conflicts of  
431 interest to declare.

432

433 **Funding**

434 This work was supported by the Genome Korea Project in Ulsan Research Funds (1.180024.01  
435 and 1.180017.01) of Ulsan National Institute of Science & Technology (UNIST). This work was  
436 also supported by a grant from the Marine Biotechnology Program (20170305, Development of  
437 Biomedical materials based on marine proteins) and the Collaborative Genome Program  
438 (20140428) funded by the Ministry of Oceans and Fisheries, Korea. This work was also  
439 supported by the Collaborative Genome Program for Fostering New Post-Genome Industry of  
440 the National Research Foundation (NRF) funded by the Ministry of Science and ICT (MSIT)  
441 (NRF-2017M3C9A6047623 and NRF-2017R1A2B2012541).

442

443 **Acknowledgements**

444 Korea Institute of Science and Technology Information (KISTI) provided us with Korea  
445 Research Environment Open NETwork (KREONET), which is the internet connection service  
446 for efficient information and data transfer.

447

## 448 References

- 449 1. Park E, Hwang DS, Lee JS, Song JI, Seo TK, Won YJ: **Estimation of divergence times in**  
450 **cnidarian evolution based on mitochondrial protein-coding genes and the fossil record.** *Mol*  
451 *Phylogenet Evol* 2012, **62**:329-345.
- 452 2. Arai MN: *A functional biology of Scyphozoa*. Springer Science & Business Media; 2012.
- 453 3. Hale G: **The classification and distribution of the class Scyphozoa.** *Eugene: University of*  
454 *Oregon* 1999.
- 455 4. Anderson PA, Schwab WE: **The organization and structure of nerve and muscle in the**  
456 **jellyfish *Cyanea capillata* (Coelenterata; Scyphozoa).** *Journal of Morphology* 1981, **170**:383-  
457 399.
- 458 5. Gemmell BJ, Costello JH, Colin SP, Stewart CJ, Dabiri JO, Tafti D, Priya S: **Passive energy**  
459 **recapture in jellyfish contributes to propulsive advantage over other metazoans.** *Proc Natl*  
460 *Acad Sci U S A* 2013, **110**:17904-17909.
- 461 6. Dong Z, Liu D, Keesing JK: **Jellyfish blooms in China: Dominant species, causes and**  
462 **consequences.** *Mar Pollut Bull* 2010, **60**:954-963.
- 463 7. Simao FA, Waterhouse RM, Ioannidis P, Kriventseva EV, Zdobnov EM: **BUSCO: assessing**  
464 **genome assembly and annotation completeness with single-copy orthologs.** *Bioinformatics*  
465 2015, **31**:3210-3212.
- 466 8. Chapman JA, Kirkness EF, Simakov O, Hampson SE, Mitros T, Weinmaier T, Rattei T,  
467 Balasubramanian PG, Borman J, Busam D, et al: **The dynamic genome of *Hydra*.** *Nature* 2010,  
468 **464**:592-596.
- 469 9. Shinzato C, Shoguchi E, Kawashima T, Hamada M, Hisata K, Tanaka M, Fujie M, Fujiwara M,  
470 Koyanagi R, Ikuta T: **Using the *Acropora digitifera* genome to understand coral responses to**  
471 **environmental change.** *Nature* 2011, **476**:320.
- 472 10. Putnam NH, Srivastava M, Hellsten U, Dirks B, Chapman J, Salamov A, Terry A, Shapiro H,  
473 Lindquist E, Kapitonov VV, et al: **Sea anemone genome reveals ancestral eumetazoan gene**  
474 **repertoire and genomic organization.** *Science* 2007, **317**:86-94.
- 475 11. Galliot B, Quiquand M, Ghila L, de Rosa R, Miljkovic-Licina M, Chera S: **Origins of**  
476 **neurogenesis, a cnidarian view.** *Dev Biol* 2009, **332**:2-24.
- 477 12. Shen W, Wang D, Ye B, Shi M, Ma L, Zhang Y, Zhao Z: **GC3-biased gene domains in**  
478 **mammalian genomes.** *Bioinformatics* 2015, **31**:3081-3084.
- 479 13. Wan X-F, Xu D, Kleinhofs A, Zhou J: **Quantitative relationship between synonymous codon**  
480 **usage bias and GC composition across unicellular genomes.** *BMC Evolutionary Biology* 2004,  
481 **4**:19.
- 482 14. Tatarinova TV, Alexandrov NN, Bouck JB, Feldmann KA: **GC3 biology in corn, rice, sorghum**  
483 **and other grasses.** *BMC Genomics* 2010, **11**:308.
- 484 15. Steinmetz PR, Kraus JE, Larroux C, Hammel JU, Amon-Hassenzahl A, Houliston E, Worheide G,  
485 Nickel M, Degnan BM, Technau U: **Independent evolution of striated muscles in cnidarians**  
486 **and bilaterians.** *Nature* 2012, **487**:231-234.
- 487 16. Seipel K, Schmid V: **Evolution of striated muscle: jellyfish and the origin of triploblasty.** *Dev*  
488 *Biol* 2005, **282**:14-26.
- 489 17. Cegolon L, Heymann WC, Lange JH, Mastrangelo G: **Jellyfish stings and their management: a**  
490 **review.** *Marine drugs* 2013, **11**:523-550.
- 491 18. Leclere L, Rottinger E: **Diversity of Cnidarian Muscles: Function, Anatomy, Development**  
492 **and Regeneration.** *Front Cell Dev Biol* 2016, **4**:157.
- 493 19. Watanabe H, Fujisawa T, Holstein TW: **Cnidarians and the evolutionary origin of the nervous**  
494 **system.** *Dev Growth Differ* 2009, **51**:167-183.
- 495 20. Kamm K, Schierwater B, Jakob W, Dellaporta SL, Miller DJ: **Axial patterning and**  
496 **diversification in the cnidaria predate the Hox system.** *Curr Biol* 2006, **16**:920-926.

- 497 21. Chourrout D, Delsuc F, Chourrout P, Edvardsen RB, Rentzsch F, Renfer E, Jensen MF, Zhu B,  
498 de Jong P, Steele RE, Technau U: **Minimal ProtoHox cluster inferred from bilaterian and**  
499 **cnidarian Hox complements.** *Nature* 2006, **442**:684-687.
- 500 22. Finnerty JR, Pang K, Burton P, Paulson D, Martindale MQ: **Origins of bilateral symmetry: Hox**  
501 **and dpp expression in a sea anemone.** *Science* 2004, **304**:1335-1337.
- 502 23. Kusserow A, Pang K, Sturm C, Hroudá M, Lentfer J, Schmidt HA, Technau U, von Haeseler A,  
503 Hobmayer B, Martindale MQ, Holstein TW: **Unexpected complexity of the Wnt gene family in**  
504 **a sea anemone.** *Nature* 2005, **433**:156-160.
- 505 24. Nusse R: **An ancient cluster of Wnt paralogs.** *Trends Genet* 2001, **17**:443.
- 506 25. Han C-H, Uye S-i: **Combined effects of food supply and temperature on asexual**  
507 **reproduction and somatic growth of polyps of the common jellyfish Aurelia aurita sl.**  
508 *Plankton and Benthos Research* 2010, **5**:98-105.
- 509 26. Maiorova TD, Kosevich IA, Melekhova OP: **[On some features of embryonic development**  
510 **and metamorphosis of Aurelia aurita (Cnidaria, Scyphozoa)].** *Ontogeny* 2012, **43**:333-349.
- 511 27. Müller WA, Leitz T: **Metamorphosis in the Cnidaria.** *Canadian Journal of Zoology* 2002,  
512 **80**:1755-1771.
- 513 28. Schmich J, Trepel S, Leitz T: **The role of GLWamides in metamorphosis of Hydractinia**  
514 **echinata.** *Dev Genes Evol* 1998, **208**:267-273.
- 515 29. Fuchs B, Wang W, Graspeuntner S, Li Y, Insua S, Herbst EM, Dirksen P, Böhm AM, Hemmrich  
516 G, Sommer F, et al: **Regulation of polyp-to-jellyfish transition in Aurelia aurita.** *Curr Biol*  
517 2014, **24**:263-273.
- 518 30. Cunningham TJ, Duester G: **Mechanisms of retinoic acid signalling and its roles in organ and**  
519 **limb development.** *Nat Rev Mol Cell Biol* 2015, **16**:110-123.
- 520 31. So EN, Crowe DL: **Characterization of a retinoic acid responsive element in the human ets-1**  
521 **promoter.** *IUBMB Life* 2000, **50**:365-370.
- 522 32. Lassen S, Helmholz H, Ruhnau C, Prange A: **A novel proteinaceous cytotoxin from the**  
523 **northern Scyphozoa Cyanea capillata (L.) with structural homology to cubozoan**  
524 **haemolysins.** *Toxicon* 2011, **57**:721-729.
- 525 33. Jungo F, Bougueleret L, Xenarios I, Poux S: **The UniProtKB/Swiss-Prot Tox-Prot program: A**  
526 **central hub of integrated venom protein data.** *Toxicon* 2012, **60**:551-557.
- 527 34. Rawlings ND, Barrett AJ: **Evolutionary families of metallopeptidases.** *Methods Enzymol* 1995,  
528 **248**:183-228.
- 529 35. Li R, Yu H, Xue W, Yue Y, Liu S, Xing R, Li P: **Jellyfish venomomics and venom gland**  
530 **transcriptomics analysis of Stomolophus meleagris to reveal the toxins associated with sting.**  
531 *J Proteomics* 2014, **106**:17-29.
- 532 36. Brinkman DL, Jia X, Potriquet J, Kumar D, Dash D, Kvaskoff D, Mulvenna J: **Transcriptome**  
533 **and venom proteome of the box jellyfish Chironex fleckeri.** *BMC Genomics* 2015, **16**:407.
- 534 37. Jouiaei M, Yanagihara AA, Madio B, Nevalainen TJ, Alewood PF, Fry BG: **Ancient Venom**  
535 **Systems: A Review on Cnidaria Toxins.** *Toxins (Basel)* 2015, **7**:2251-2271.
- 536 38. Li H: **Aligning sequence reads, clone sequences and assembly contigs with BWA-MEM.**  
537 *arXiv preprint arXiv:13033997* 2013.
- 538 39. Li H, Handsaker B, Wysoker A, Fennell T, Ruan J, Homer N, Marth G, Abecasis G, Durbin R:  
539 **The sequence alignment/map format and SAMtools.** *Bioinformatics* 2009, **25**:2078-2079.
- 540 40. Edgar RC: **MUSCLE: multiple sequence alignment with high accuracy and high throughput.**  
541 *Nucleic Acids Res* 2004, **32**:1792-1797.
- 542 41. Kumar S, Stecher G, Tamura K: **MEGA7: Molecular Evolutionary Genetics Analysis Version**  
543 **7.0 for Bigger Datasets.** *Mol Biol Evol* 2016, **33**:1870-1874.
- 544 42. Chin CS, Alexander DH, Marks P, Klammer AA, Drake J, Heiner C, Clum A, Copeland A,  
545 Huddleston J, Eichler EE, et al: **Nonhybrid, finished microbial genome assemblies from long-**  
546 **read SMRT sequencing data.** *Nat Methods* 2013, **10**:563-569.



- 547 43. Boetzer M, Henkel CV, Jansen HJ, Butler D, Pirovano W: **Scaffolding pre-assembled contigs**  
548 **using SSPACE**. *Bioinformatics* 2010, **27**:578-579.
- 549 44. Luo R, Liu B, Xie Y, Li Z, Huang W, Yuan J, He G, Chen Y, Pan Q, Liu Y, et al: **SOAPdenovo2:**  
550 **an empirically improved memory-efficient short-read de novo assembler**. *Gigascience* 2012,  
551 **1**:18.
- 552 45. Stanke M, Keller O, Gunduz I, Hayes A, Waack S, Morgenstern B: **AUGUSTUS: ab initio**  
553 **prediction of alternative transcripts**. *Nucleic Acids Res* 2006, **34**:W435-439.
- 554 46. Benson G: **Tandem repeats finder: a program to analyze DNA sequences**. *Nucleic acids*  
555 *research* 1999, **27**:573.
- 556 47. Tarailo-Graovac M, Chen N: **Using RepeatMasker to identify repetitive elements in genomic**  
557 **sequences**. *Current protocols in bioinformatics* 2009:4.10. 11-14.10. 14.
- 558 48. Domazet-Loso T, Brajkovic J, Tautz D: **A phylostratigraphy approach to uncover the**  
559 **genomic history of major adaptations in metazoan lineages**. *Trends Genet* 2007, **23**:533-539.
- 560 49. Kumar S, Stecher G, Suleski M, Hedges SB: **TimeTree: A Resource for Timelines, Timetrees,**  
561 **and Divergence Times**. *Mol Biol Evol* 2017, **34**:1812-1819.
- 562 50. Parr CS, Wilson N, Leary P, Schulz KS, Lans K, Walley L, Hammock JA, Goddard A, Rice J,  
563 Studer M, et al: **The Encyclopedia of Life v2: Providing Global Access to Knowledge About**  
564 **Life on Earth**. *Biodivers Data J* 2014:e1079.
- 565 51. Li L, Stoeckert CJ, Jr., Roos DS: **OrthoMCL: identification of ortholog groups for eukaryotic**  
566 **genomes**. *Genome Res* 2003, **13**:2178-2189.
- 567 52. Stamatakis A: **RAXML-VI-HPC: maximum likelihood-based phylogenetic analyses with**  
568 **thousands of taxa and mixed models**. *Bioinformatics* 2006, **22**:2688-2690.
- 569 53. Yang Z: **PAML 4: phylogenetic analysis by maximum likelihood**. *Mol Biol Evol* 2007,  
570 **24**:1586-1591.
- 571 54. Han MV, Thomas GW, Lugo-Martinez J, Hahn MW: **Estimating gene gain and loss rates in**  
572 **the presence of error in genome assembly and annotation using CAFE 3**. *Mol Biol Evol* 2013,  
573 **30**:1987-1997.
- 574 55. Zdobnov EM, Apweiler R: **InterProScan--an integration platform for the signature-**  
575 **recognition methods in InterPro**. *Bioinformatics* 2001, **17**:847-848.
- 576 56. Haas BJ, Papanicolaou A, Yassour M, Grabherr M, Blood PD, Bowden J, Couger MB, Eccles D,  
577 Li B, Lieber M, et al: **De novo transcript sequence reconstruction from RNA-seq using the**  
578 **Trinity platform for reference generation and analysis**. *Nat Protoc* 2013, **8**:1494-1512.
- 579 57. Trapnell C, Roberts A, Goff L, Pertea G, Kim D, Kelley DR, Pimentel H, Salzberg SL, Rinn JL,  
580 Pachter L: **Differential gene and transcript expression analysis of RNA-seq experiments with**  
581 **TopHat and Cufflinks**. *Nat Protoc* 2012, **7**:562-578.
- 582 58. Wang L, Feng Z, Wang X, Wang X, Zhang X: **DEGseq: an R package for identifying**  
583 **differentially expressed genes from RNA-seq data**. *Bioinformatics* 2010, **26**:136-138.
- 584 59. DuBuc TQ, Ryan JF, Shinzato C, Satoh N, Martindale MQ: **Coral comparative genomics reveal**  
585 **expanded Hox cluster in the cnidarian-bilaterian ancestor**. *Integr Comp Biol* 2012, **52**:835-  
586 841.
- 587 60. Chiori R, Jager M, Denker E, Wincker P, Da Silva C, Le Guyader H, Manuel M, Queinnec E:  
588 **Are Hox genes ancestrally involved in axial patterning? Evidence from the hydrozoan**  
589 **Clytia hemisphaerica (Cnidaria)**. *PLoS One* 2009, **4**:e4231.
- 590 61. Price MN, Dehal PS, Arkin AP: **FastTree 2--approximately maximum-likelihood trees for**  
591 **large alignments**. *PLoS One* 2010, **5**:e9490.
- 592 62. Lengfeld T, Watanabe H, Simakov O, Lindgens D, Gee L, Law L, Schmidt HA, Ozbek S, Bode  
593 H, Holstein TW: **Multiple Wnts are involved in Hydra organizer formation and regeneration**.  
594 *Dev Biol* 2009, **330**:186-199.
- 595 63. Capella-Gutierrez S, Silla-Martinez JM, Gabaldon T: **trimAl: a tool for automated alignment**  
596 **trimming in large-scale phylogenetic analyses**. *Bioinformatics* 2009, **25**:1972-1973.
- 597

**Fig. 1** Gene family relationships of cnidarian and metazoan species. **a** Venn diagram of the number of unique and shared gene families among four cnidarian genomes. **b** Gene family expansions and contractions in the *Nemopilema* genome. Numbers designate the number of gene families that have expanded (red, +) and contracted (blue, -) after the split from the common ancestor. **c** The proportion of *Nemopilema* genes in each evolutionary era. While most *Nemopilema* genes (~80%) are ancient (~1,877 Mya), a few (~3%) are of intermediate age (~659 Mya) and a significant fraction (~17%) are relatively young (~147 Mya).

**Fig. 2** Gene expression patterns of medusa bell and tentacle tissues and expansion of myosin heavy chain genes in jellyfish. **a** *P*-value heatmap of enriched GO categories using highly expressed genes in medusa bell tissue. Greater than 2-fold and 4-fold higher expression in medusa bell than tentacles are shown in each column. Only shared GO categories between *N. nomurai* and *S. malayensis* are shown. **b** *P*-value heatmap of enriched GO categories using highly expressed genes in tentacle tissue. **c** Unrooted Le-Gascuel model tree of myosin heavy chain genes using BLAST best hit method. **d** Expression pattern of MYH and MYL genes in *Nemopilema*. Genes that are not expressed in both tentacles and medusa bell were excluded.

**Fig. 3** Retinoic acid signaling pathway and RAREs in *Nemopilema*. **a** Schematic of the retinoic acid signaling pathway in humans. Blue denotes presence of the gene and/or element in Cnidaria. Red denotes presence only in *Nemopilema* among the published cnidarians. **b** The distribution of distances between the RAREs and the nearest gene. The distance was calculated by identifying its proximity to transcription start site (TSS) of the genes. The gene count was calculated for

each non-overlapping 1 Kb bin across a range of -100 Kb to 100 Kb. **c** The RAREs located nearby posterior Hox genes in *Nemopilema*.

**Fig. 4** Phylogenetic analysis of venom related domains in non-bilaterian metazoans. Five venom domains (PF01421, PF01549, PF07648, PF00068, and PF05826) are represented in four circular dendrograms. Two phospholipase A<sub>2</sub> domains (PF00068 and PF05826) were merged into one circular dendrogram (bottom right) and shadings on branches and nodes (sky-blue) in phospholipase A<sub>2</sub> denote the PF05826 domain.

## **Additional files**

**Additional file 1:** Supplementary figures, tables, and methods. This document contains additional supporting evidence for this study that are presented in form of supplemental figures and tables.

**Additional file 2:** Supplementary data. Protein domain annotation statistics.

**Additional file 3:** Supplementary data. List of gene clusters evolving faster in the *Nemopilema nomurai* genome.

**Additional file 4:** Supplementary data. Gene ontology and KEGG enrichment result of top 100 and 500 GC3 genes in *Nemopilema nomurai*.

**Additional file 5:** Supplementary data. Gene ontology enrichment result of highly expressed genes in *Nemopilema nomurai* and *Sanderia malayensis*.



**a**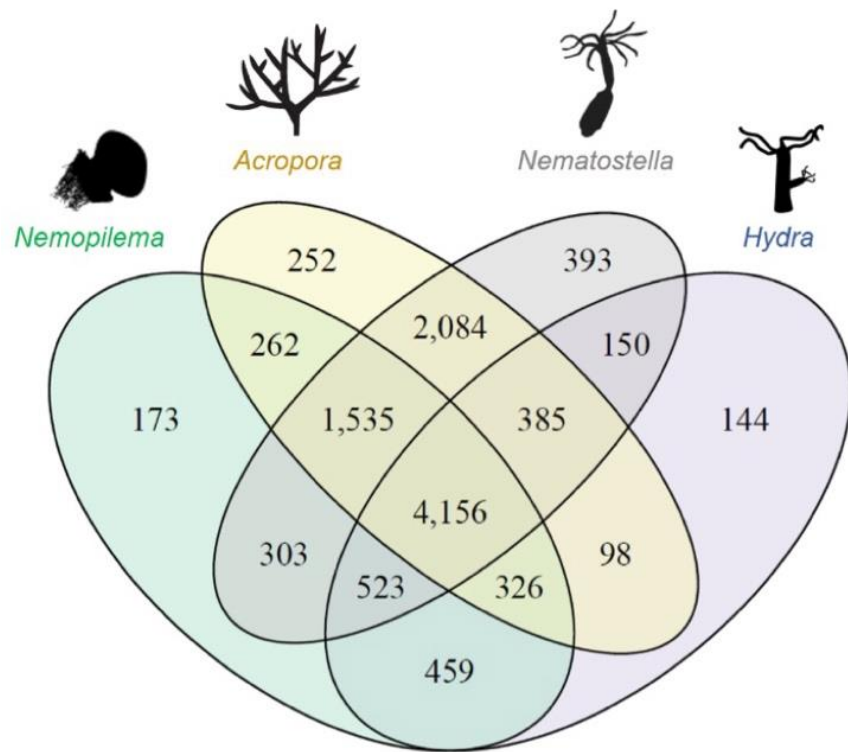**b**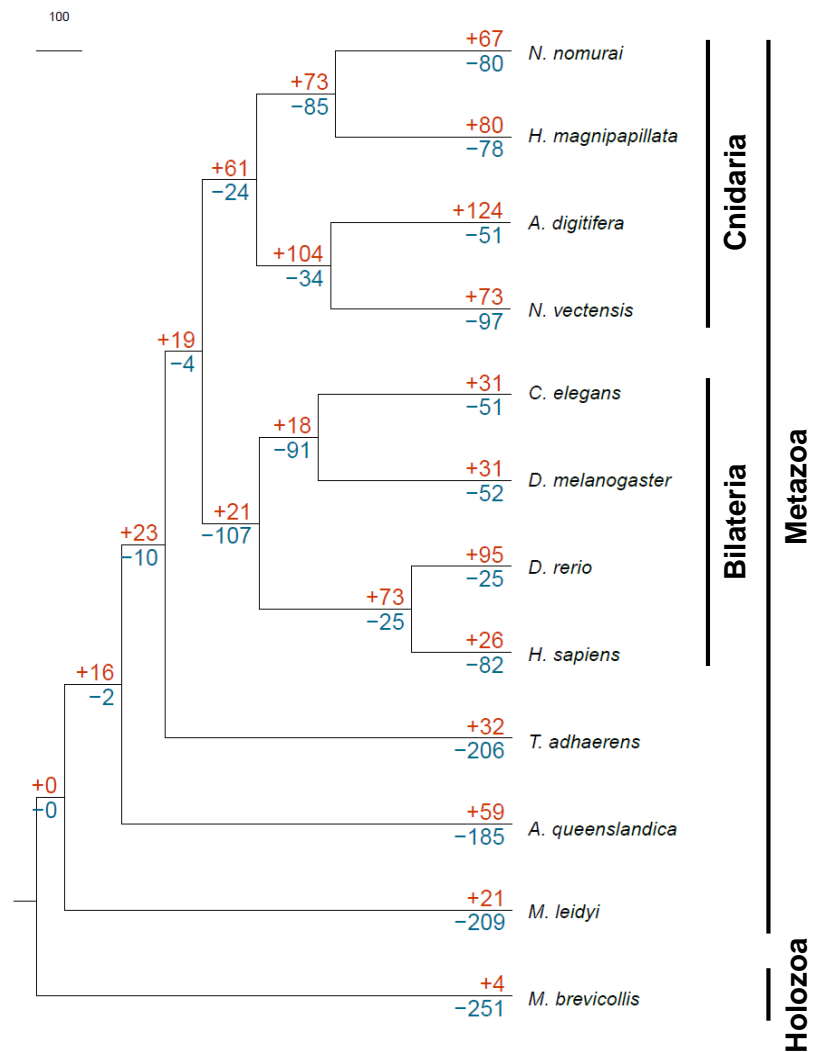**c**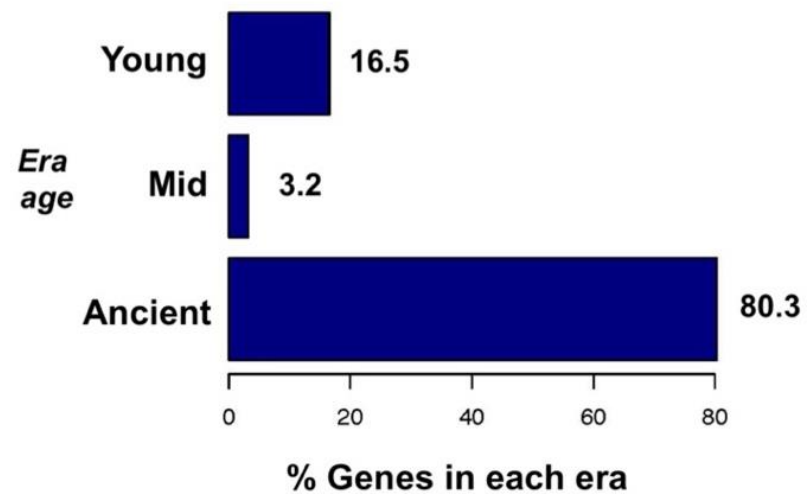

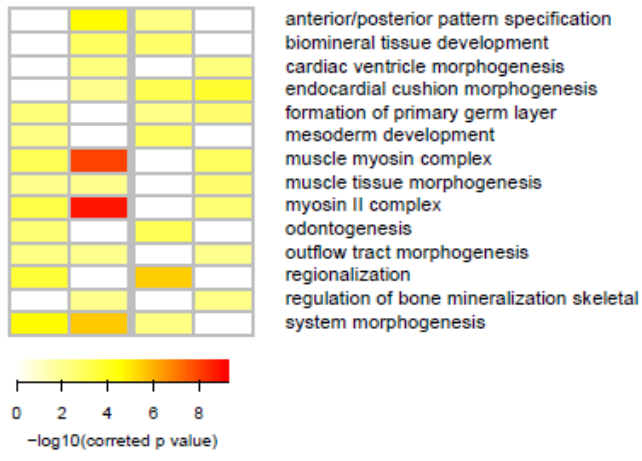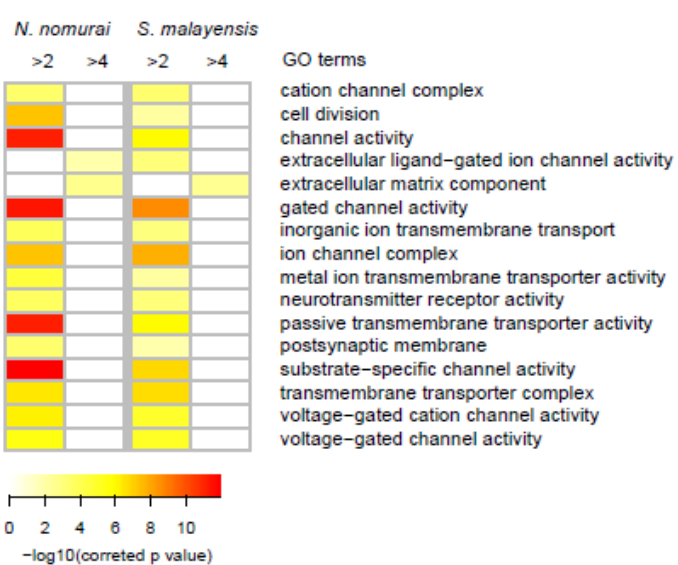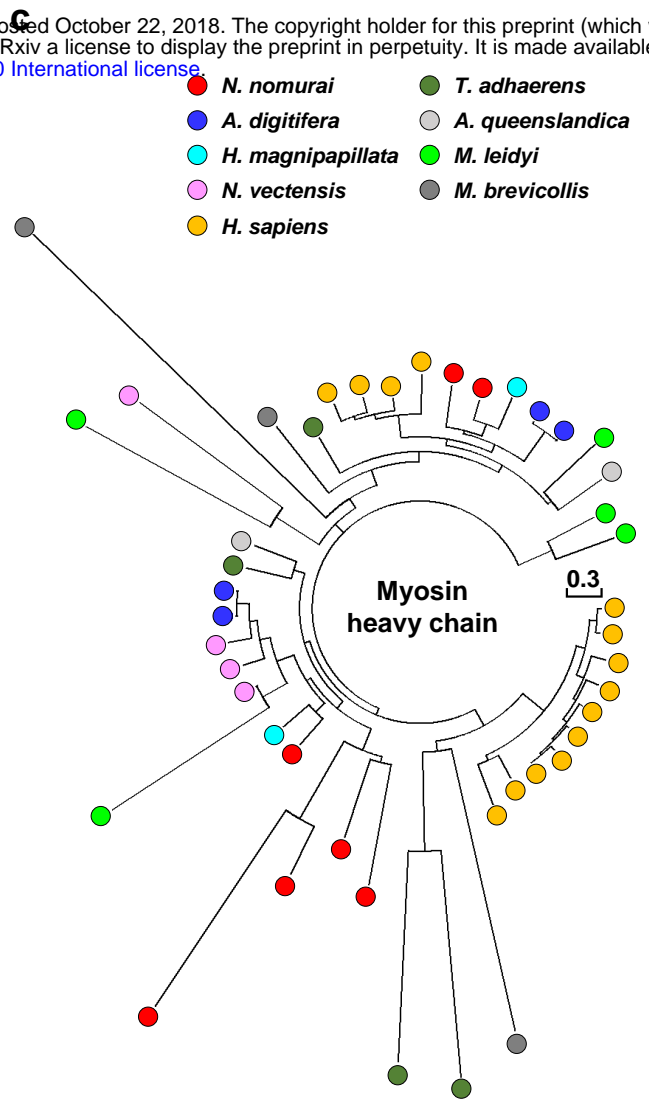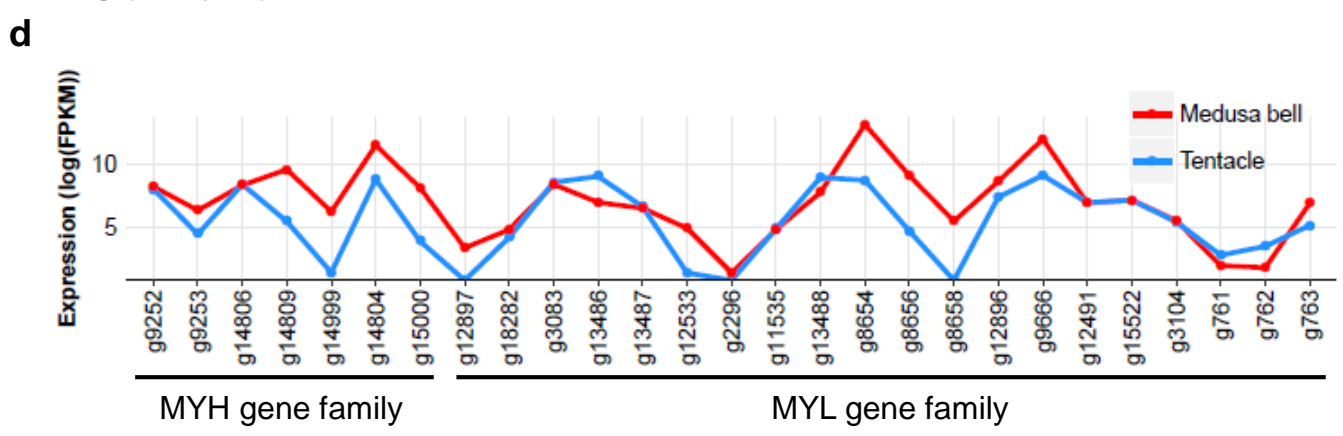

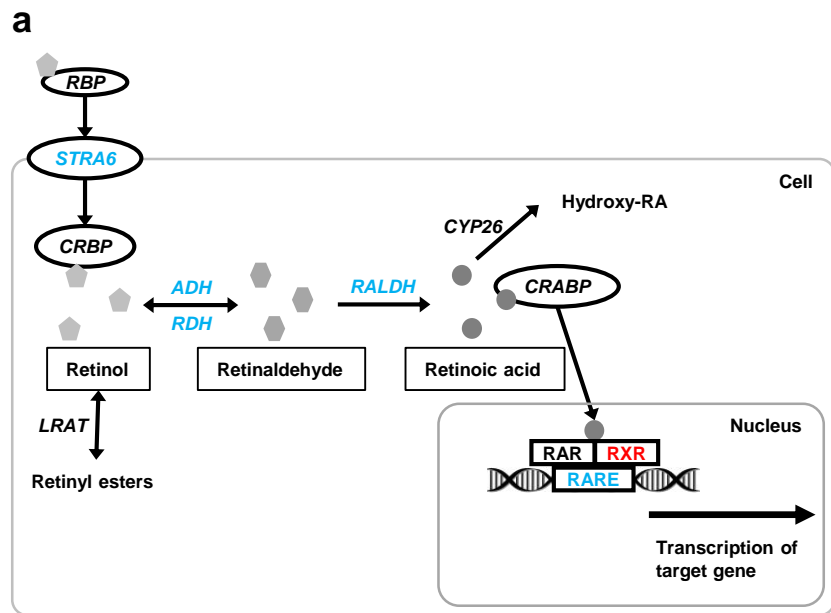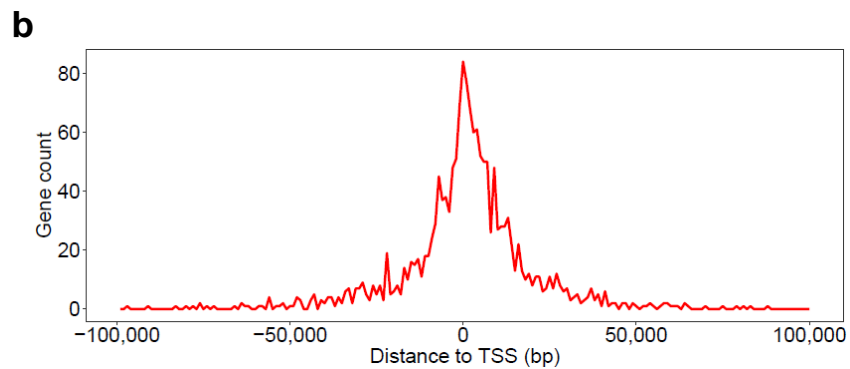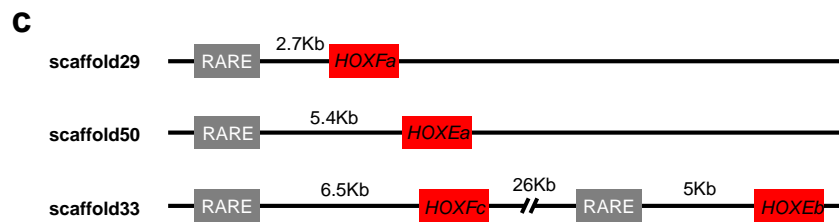



**Reprolysin (M12B) family zinc metalloprotease  
(PF01421)**

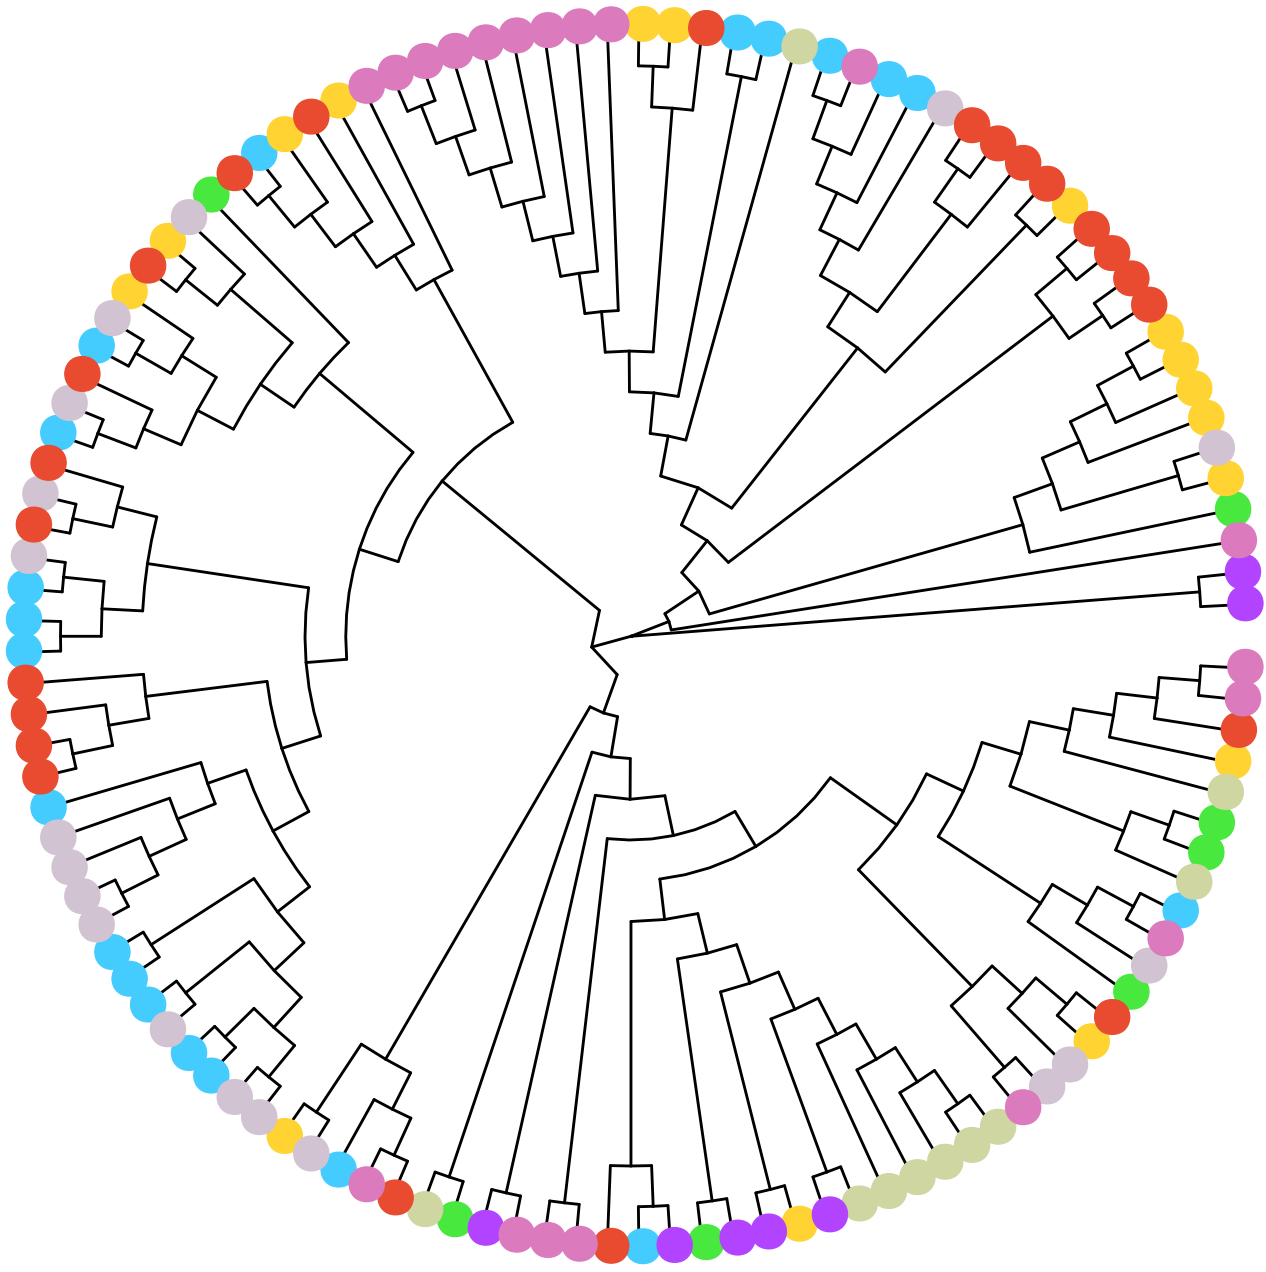

**ShK domain-like  
(PF01549)**

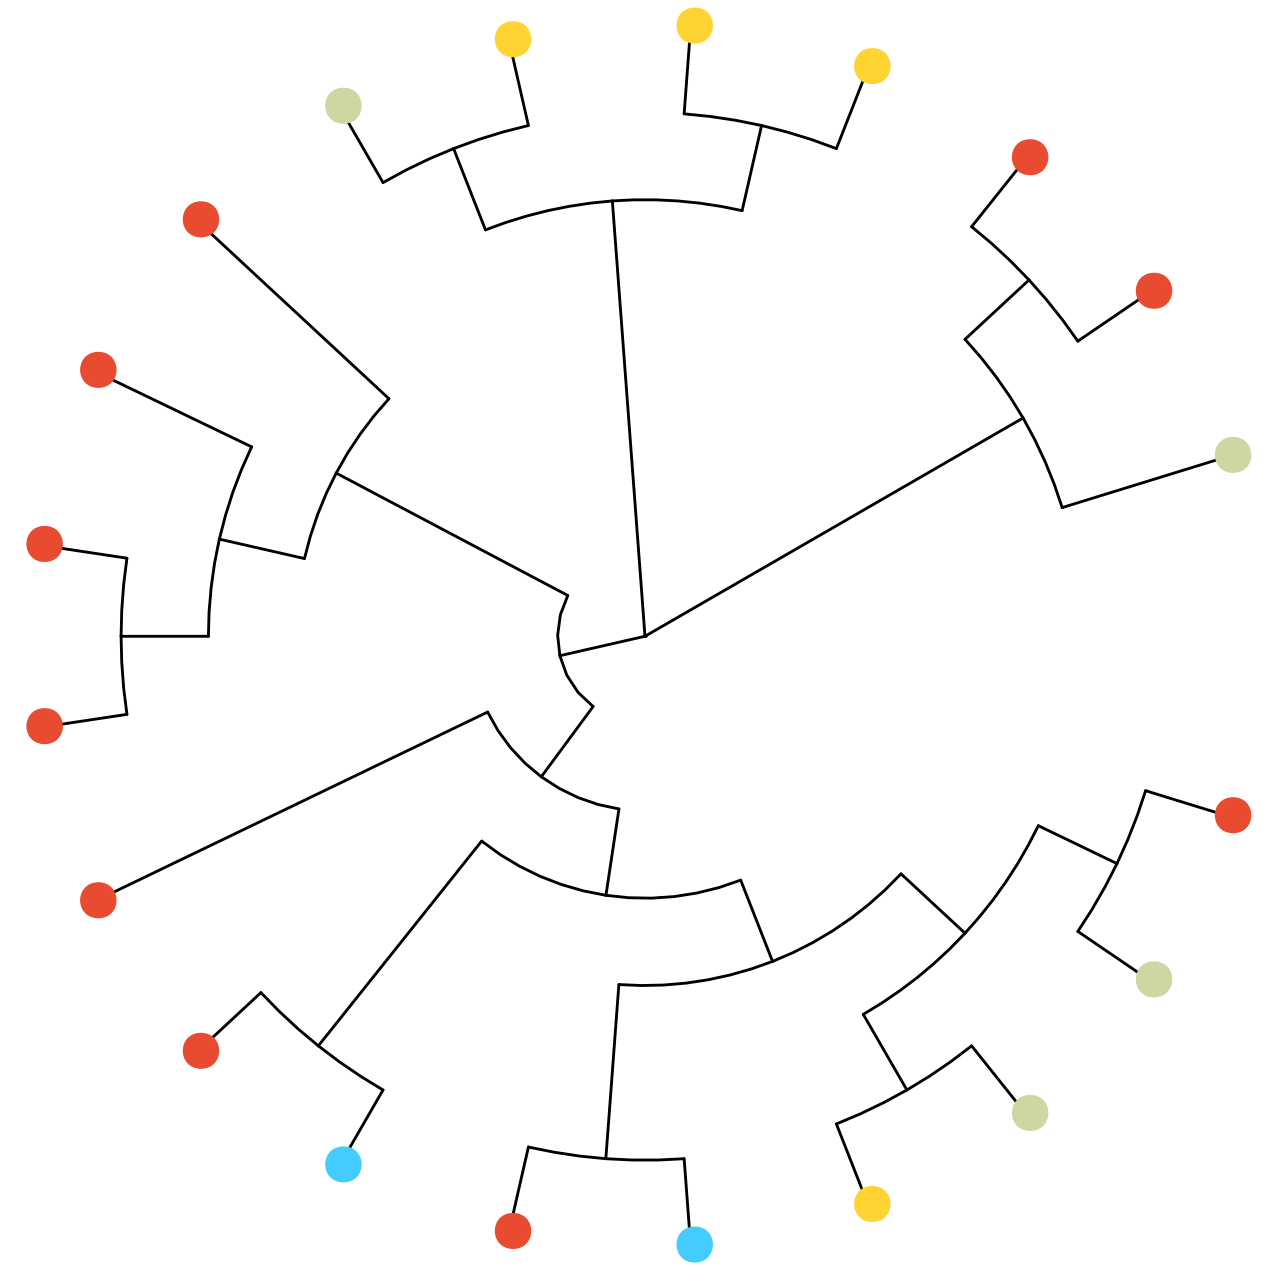

**Kazal-type serine protease inhibitor domain  
(PF07648)**

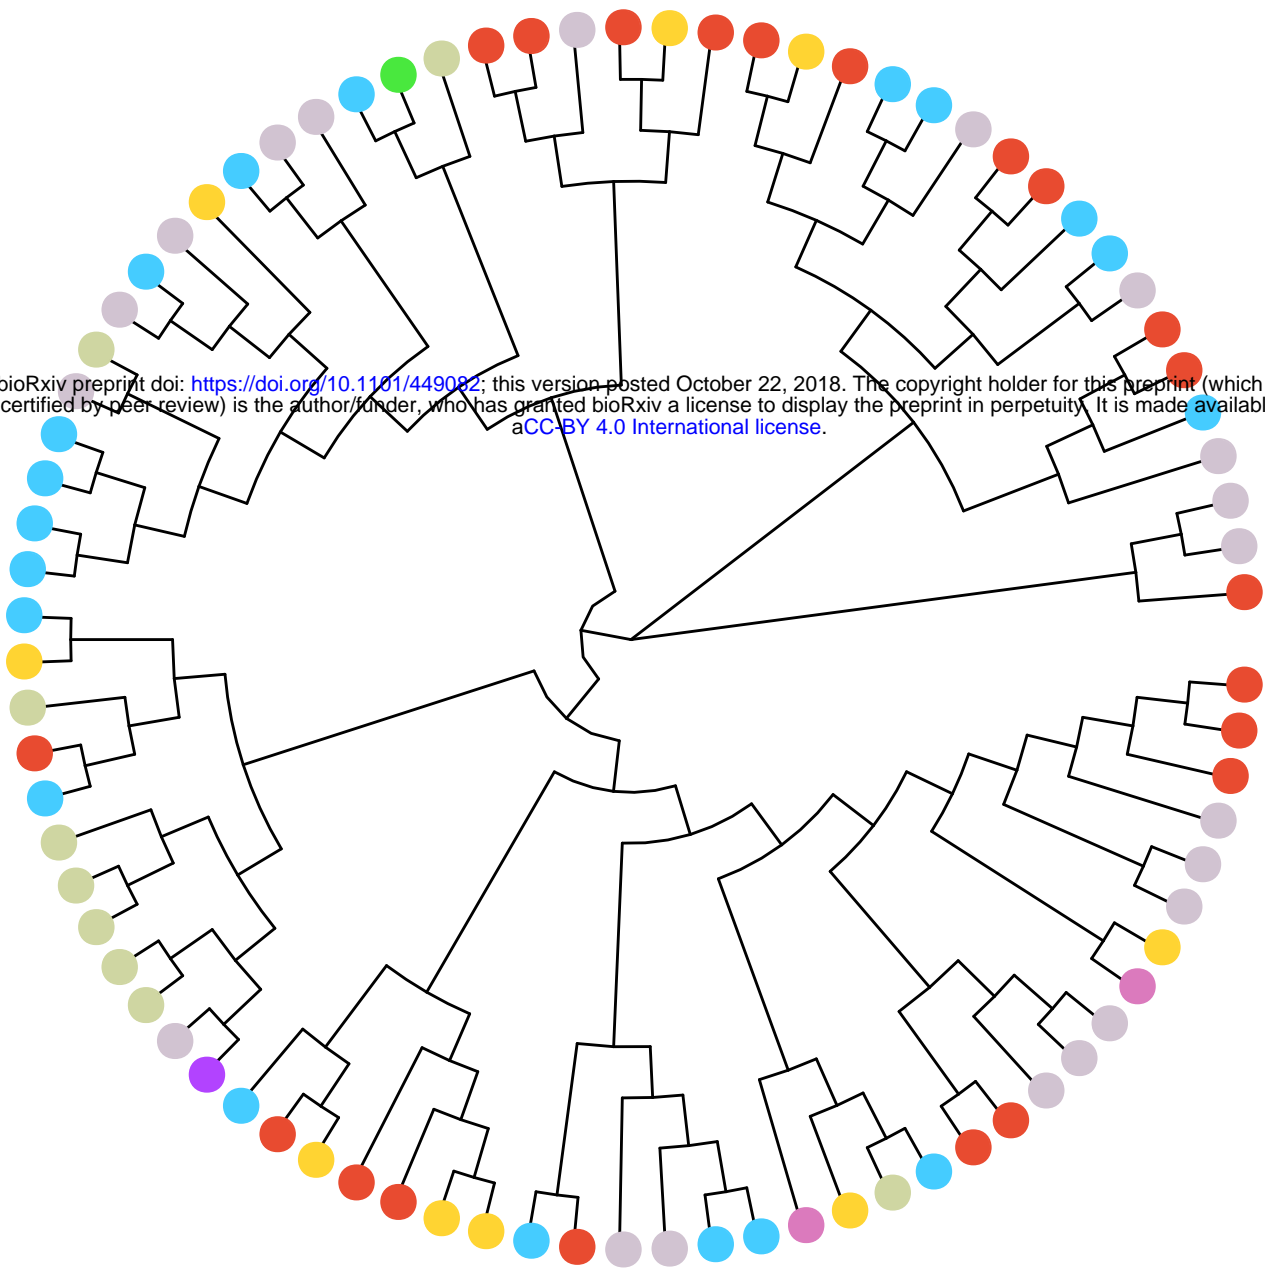

bioRxiv preprint doi: <https://doi.org/10.1101/449082>; this version posted October 22, 2018. The copyright holder for this preprint (which was not certified by peer review) is the author/funder, who has granted bioRxiv a license to display the preprint in perpetuity. It is made available under aCC-BY 4.0 International license.

**Phospholipase A<sub>2</sub>  
(PF00068/PF05826)**

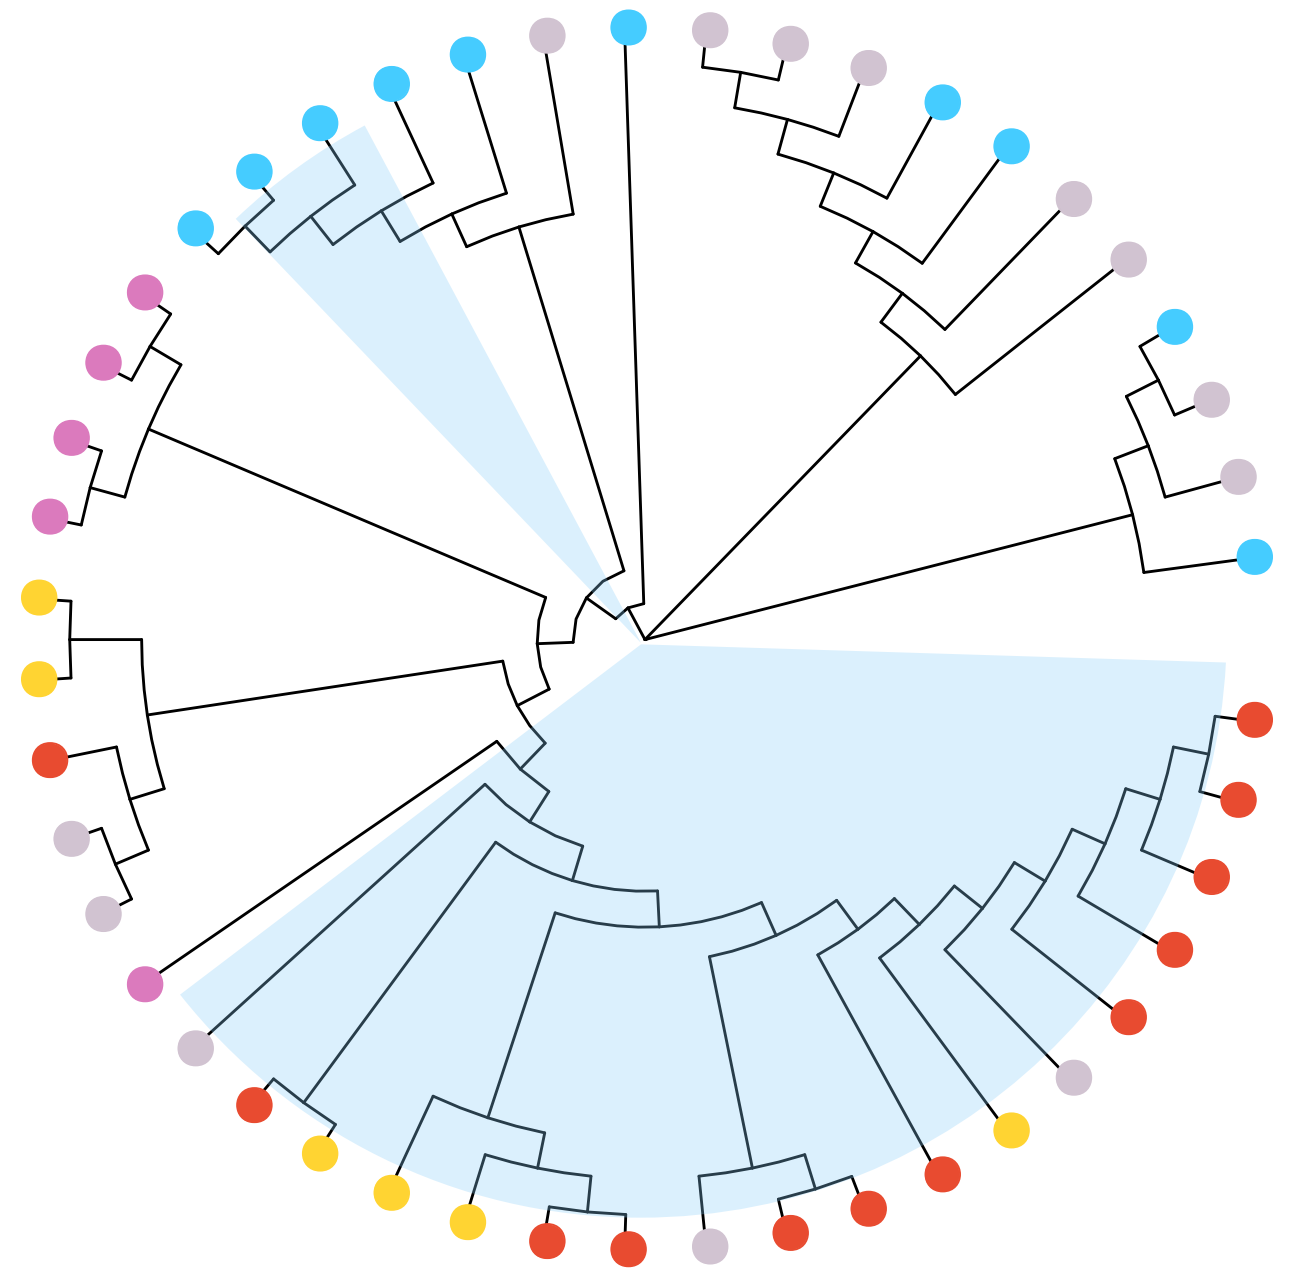

|                                                              |                                                                |                                                             |                                                         |
|--------------------------------------------------------------|----------------------------------------------------------------|-------------------------------------------------------------|---------------------------------------------------------|
| <span style="color: blue;">●</span> <i>A. digitifera</i>     | <span style="color: yellow;">●</span> <i>H. magnipapillata</i> | <span style="color: purple;">●</span> <i>M. brevicollis</i> | <span style="color: red;">●</span> <i>N. nomurai</i>    |
| <span style="color: green;">●</span> <i>A. queenslandica</i> | <span style="color: olive;">●</span> <i>M. leidy</i>           | <span style="color: grey;">●</span> <i>N. vectensis</i>     | <span style="color: pink;">●</span> <i>T. adhaerens</i> |
